# Supplementary material for: A-site sub-stoichiometry and oxygen vacancies as the origin of the electrical properties of Sr2−yLuNb1−xTixO6−δ perovskite-like materials
Source: Royal Society of Chemistry journal article supplement (doi:10.1039/c4dt01337a), 2014-01-01
Supplement: c4dt01337a1.pdf [file c4dt01337a1.pdf]

## SUPPLEMENTARY INFORMATION

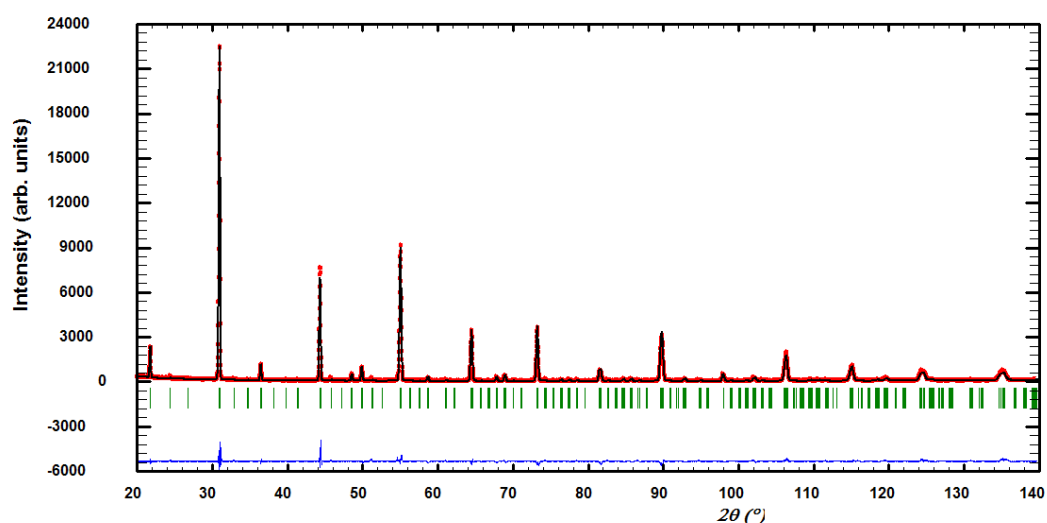

**Figure SI 1:** Experimental (red circles) and calculated (black continuous line) XRD patterns (and their difference, blue line at the bottom) for  $\text{Sr}_2\text{LuNb}_{0.90}\text{Ti}_{0.10}\text{O}_6$  assuming S.G.  $P2_1/n$ . The green vertical bars indicate the positions of the Bragg peaks.

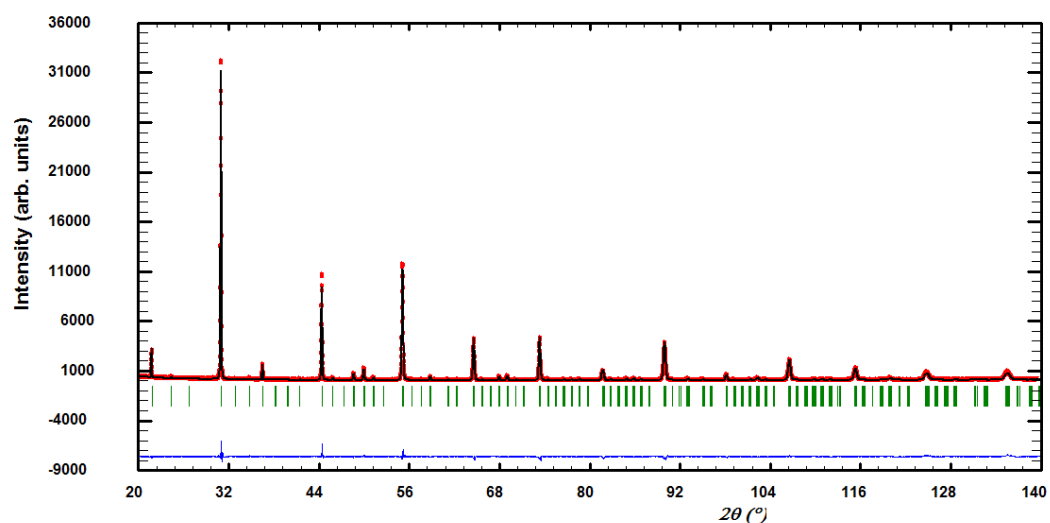

**Figure SI 2:** Experimental (red circles) and calculated (black continuous line) XRD patterns (and their difference, blue line at the bottom) for  $\text{Sr}_2\text{LuNb}_{0.80}\text{Ti}_{0.20}\text{O}_6$  assuming S.G.  $P2_1/n$ . The green vertical bars indicate the positions of the Bragg peaks.

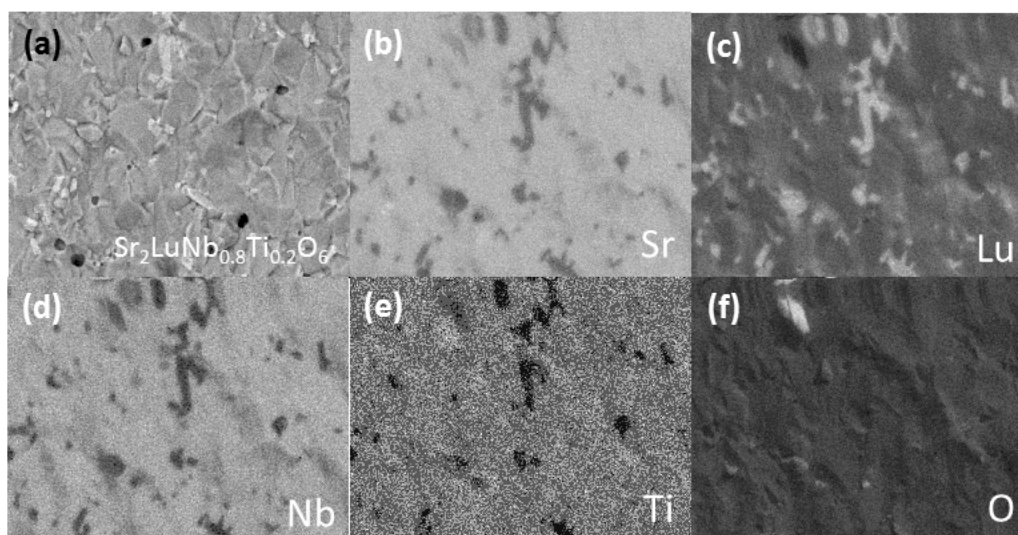

**Figure SI 3:** (a) Back-scattered electrons (BSE) image taken at a magnification of x 2000 and element-distribution maps of  $\text{Sr}_2\text{LuNb}_{0.8}\text{Ti}_{0.2}\text{O}_6$  sample: (b) Sr, (c) Lu, (d) Nb, (e) Ti and (f) O.

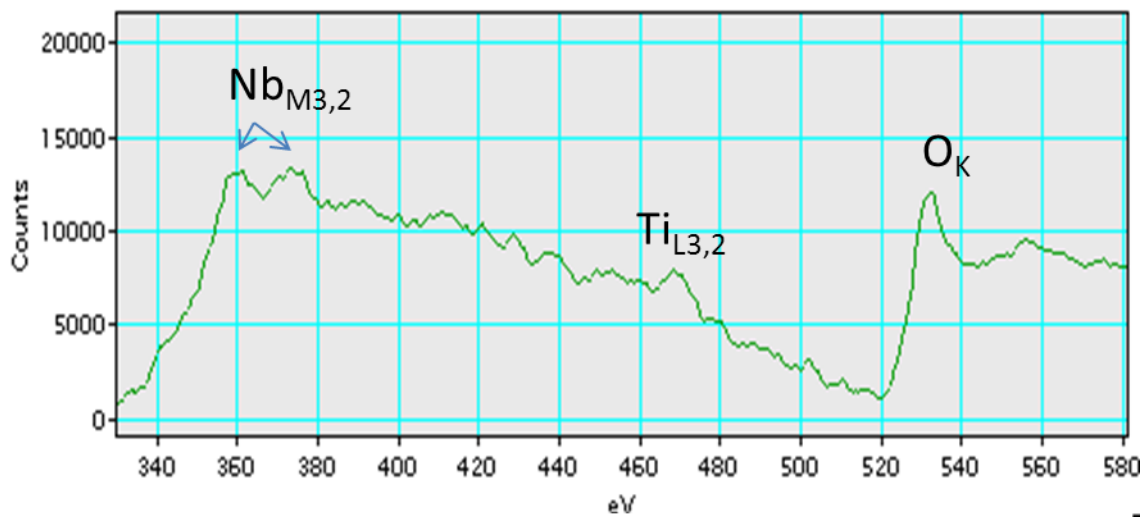

**Figure SI 4:** EELS spectra of the Nb  $M_{3,2}$ , Ti  $L_{3,2}$ , O  $K$  edges for  $Sr_2LuNb_{0.9}Ti_{0.1}O_6$ .

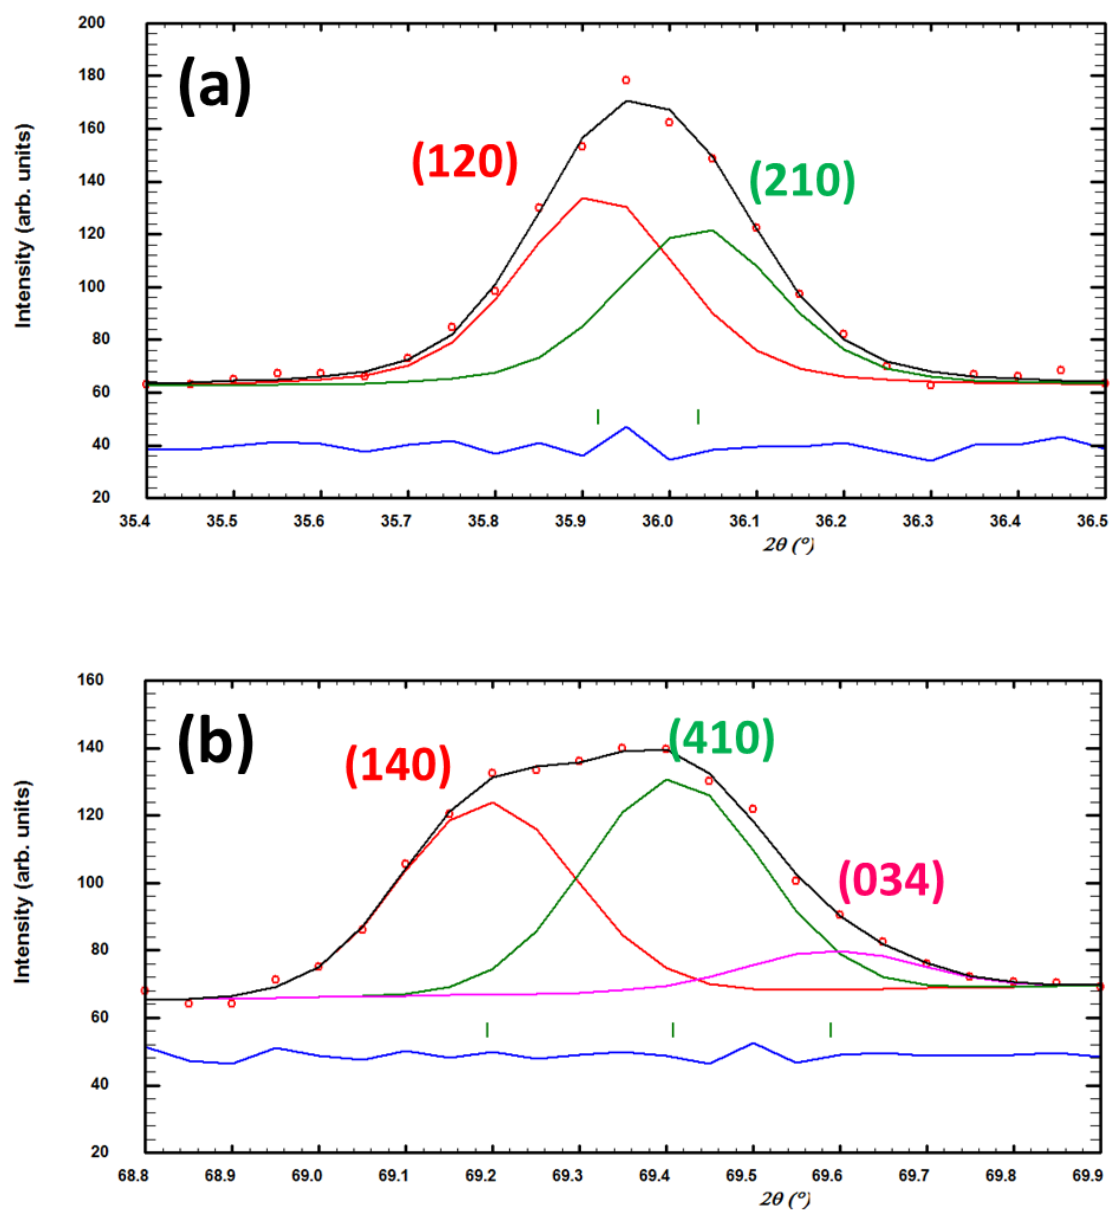

**Figure SI 5:** Enlarged plot of the NPD zone where Bragg peaks (a) (120)/(210) and (b) (140)/(410) appear. These maxima are not compatible with S.G. P2nn previously proposed for  $\text{Sr}_2\text{LuNbO}_6$  (Sirotkin, V.P., Efremov, V.A., Trunov, V K.; The crystal structures of  $\text{Sr}_2\text{SmNbO}_6$  and  $\text{Sr}_2\text{TmNbO}_6$ , *Russian Journal of Inorganic Chemistry* **1985**, 30(7), 981-983).

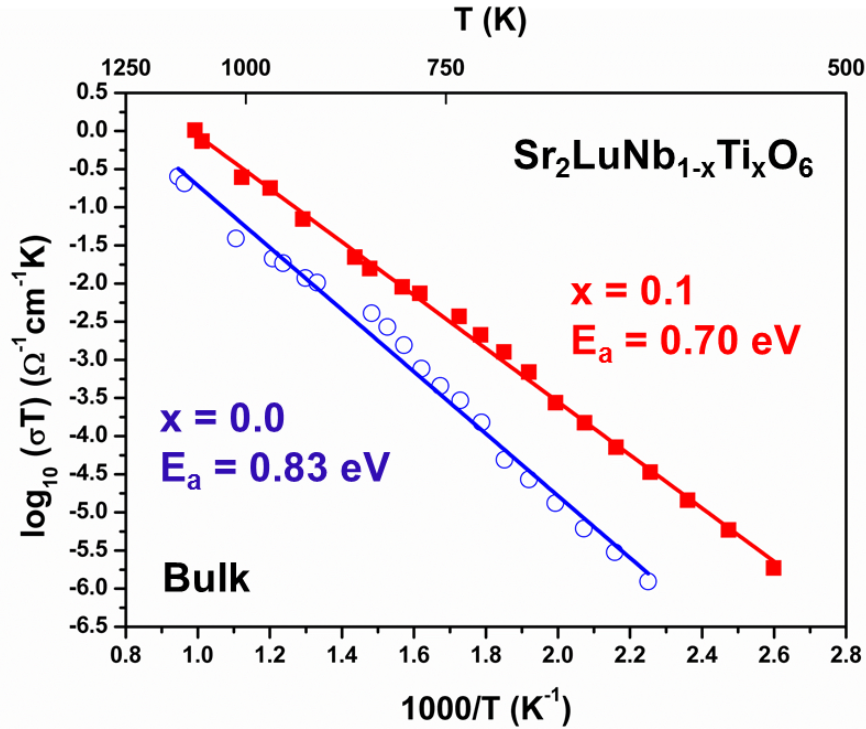

**Figure SI 6:** Arrhenius plots showing the temperature dependence of the bulk conductivity of Sr<sub>2</sub>LuNb<sub>1-x</sub>Ti<sub>x</sub>O<sub>6</sub> (x=0 and 0.1). Activation energies are also indicated.

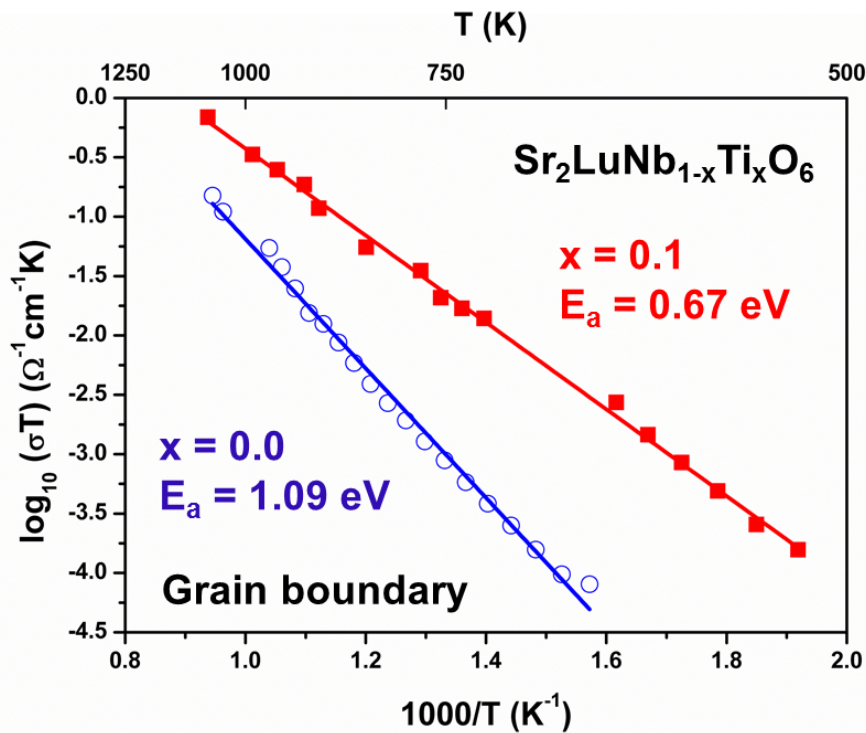

**Figure SI 7:** Arrhenius plots showing the temperature dependence of the grain boundary conductivity of Sr<sub>2</sub>LuNb<sub>1-x</sub>Ti<sub>x</sub>O<sub>6</sub> (x=0 and 0.1). Activation energies are also indicated.

**Table SI1:** Structural parameters for Sr<sub>2</sub>LuNb<sub>1-x</sub>Ti<sub>x</sub>O<sub>6</sub> compounds obtained from XRD.

|                                | <sup>b</sup> Sr <sub>2</sub> LuNbO <sub>6</sub> | <sup>c</sup> Sr <sub>2</sub> LuNb <sub>0.90</sub> Ti <sub>0.10</sub> O <sub>6</sub> | <sup>d</sup> Sr <sub>2</sub> LuNb <sub>0.80</sub> Ti <sub>0.20</sub> O <sub>6</sub> |
|--------------------------------|-------------------------------------------------|-------------------------------------------------------------------------------------|-------------------------------------------------------------------------------------|
| <b>Space Group<sup>a</sup></b> | P2 <sub>1</sub> /n                              | P2 <sub>1</sub> /n                                                                  | P2 <sub>1</sub> /n                                                                  |
| <b>a (Å)</b>                   | 5.7951(2)                                       | 5.7845(2)                                                                           | 5.7596(2)                                                                           |
| <b>b (Å)</b>                   | 5.7974(2)                                       | 5.7666(2)                                                                           | 5.7732(1)                                                                           |
| <b>c (Å)</b>                   | 8.1989(3)                                       | 8.1618(3)                                                                           | 8.1521(3)                                                                           |
| <b>β (deg)</b>                 | 90.221(2)                                       | 90.048(2)                                                                           | 90.056(3)                                                                           |
| <b>Sr position</b>             | 4e                                              | 4e                                                                                  | 4e                                                                                  |
| <b>X</b>                       | -0.0023(7)                                      | 0.0010(7)                                                                           | -0.0054(6)                                                                          |
| <b>y</b>                       | 0.0202(3)                                       | 0.0166(3)                                                                           | 0.0200(2)                                                                           |
| <b>Z</b>                       | 0.7510(7)                                       | 0.7479(6)                                                                           | 0.7492(6)                                                                           |
| <b>U*100 (Å<sup>2</sup>)</b>   | 1.52(6)                                         | 0.95(4)                                                                             | 0.64(3)                                                                             |
| <b>B' position</b>             | 2c                                              | 2c                                                                                  | 2c                                                                                  |
| <b>Occ Nb/Ti</b>               | 0.50/0.00                                       | 0.449(3)/0.051(3)                                                                   | 0.404(3)/0.096(3)                                                                   |
| <b>U*100 (Å<sup>2</sup>)</b>   | 0.84(4)                                         | 0.18(5)                                                                             | 0.47(4)                                                                             |
| <b>B'' position</b>            | 2d                                              | 2d                                                                                  | 2d                                                                                  |
| <b>Occ Lu</b>                  | 0.50                                            | 0.50                                                                                | 0.50                                                                                |
| <b>U*100 (Å<sup>2</sup>)</b>   | 0.86(4)                                         | 0.22(4)                                                                             | 0.12(4)                                                                             |
| <b>O(1) position</b>           | 4e                                              | 4e                                                                                  | 4e                                                                                  |
| <b>X</b>                       | 0.276(4)                                        | 0.316(4)                                                                            | 0.319(3)                                                                            |
| <b>y</b>                       | 0.320(4)                                        | 0.337(4)                                                                            | 0.329(2)                                                                            |
| <b>Z</b>                       | 0.970(2)                                        | 0.948(3)                                                                            | 0.950(2)                                                                            |
| <b>Occ</b>                     | 1.00                                            | 1.00                                                                                | 1.000(1)                                                                            |
| <b>U*100 (Å<sup>2</sup>)</b>   | 1.76(6)                                         | 0.81(4)                                                                             | 0.46(3)                                                                             |
| <b>O(2) position</b>           | 4e                                              | 4e                                                                                  | 4e                                                                                  |
| <b>X</b>                       | 0.289(4)                                        | 0.291(4)                                                                            | 0.281(3)                                                                            |
| <b>y</b>                       | 0.272(3)                                        | 0.268(4)                                                                            | 0.264(3)                                                                            |
| <b>Z</b>                       | 0.549(3)                                        | 0.550(3)                                                                            | 0.531(2)                                                                            |
| <b>Occ</b>                     | 1.00                                            | 1.00                                                                                | 1.000(1)                                                                            |
| <b>U*100 (Å<sup>2</sup>)</b>   | 1.76(6)                                         | 0.81(4)                                                                             | 0.46(3)                                                                             |
| <b>O(3) position</b>           | 4e                                              | 4e                                                                                  | 4e                                                                                  |
| <b>X</b>                       | 0.931(4)                                        | 0.003(4)                                                                            | 0.968(4)                                                                            |
| <b>y</b>                       | 0.486(2)                                        | 0.491(2)                                                                            | 0.495(1)                                                                            |
| <b>Z</b>                       | 0.756(2)                                        | 0.755(2)                                                                            | 0.747(2)                                                                            |
| <b>Occ</b>                     | 1.00                                            | 1.00                                                                                | 1.000(1)                                                                            |
| <b>U*100 (Å<sup>2</sup>)</b>   | 1.76(6)                                         | 0.81(4)                                                                             | 0.46(3)                                                                             |

<sup>a</sup> P2<sub>1</sub>/n: 2c (0 ½ 0), 2d (½ 0 0), 4e (xyz)

<sup>b</sup> χ<sup>2</sup>= 3.47, R<sub>wp</sub>= 13.1%, R<sub>exp</sub>= 7.01%, R<sub>B</sub>= 4.45%, Composition: Sr<sub>2</sub>LuNbO<sub>6</sub>

<sup>c</sup> χ<sup>2</sup>= 3.85, R<sub>wp</sub>= 12.9%, R<sub>exp</sub>= 6.55%, R<sub>B</sub>= 6.63%, Composition: Sr<sub>2</sub>LuNb<sub>0.898(2)</sub>Ti<sub>0.102(2)</sub>O<sub>6</sub>

<sup>d</sup> χ<sup>2</sup>= 2.33, R<sub>wp</sub>= 9.63%, R<sub>exp</sub>= 6.31%, R<sub>B</sub>= 4.62%, Composition: Sr<sub>2</sub>LuNb<sub>0.808(2)</sub>Ti<sub>0.192(2)</sub>O<sub>6</sub>

**Table S12:** Selected structural information for  $\text{Sr}_2\text{LuNb}_{1-x}\text{Ti}_x\text{O}_6$  compounds obtained from XRD data. Angles are given in degrees and distances in Å.

|                                                     | $\text{Sr}_2\text{LuNbO}_6$ | $\text{Sr}_2\text{LuNb}_{0.90}\text{Ti}_{0.10}\text{O}_6$ | $\text{Sr}_2\text{LuNb}_{0.80}\text{Ti}_{0.20}\text{O}_6$ |
|-----------------------------------------------------|-----------------------------|-----------------------------------------------------------|-----------------------------------------------------------|
| <b>B'-O(1) x 2</b>                                  | 1.92(2)                     | 2.10(2)                                                   | 2.12(2)                                                   |
| <b>B'-O(2) x 2</b>                                  | 2.04(2)                     | 1.98(2)                                                   | 2.00(2)                                                   |
| <b>B'-O(3) x 2</b>                                  | 2.04(2)                     | 2.00(2)                                                   | 1.99(2)                                                   |
| <b>Average B'-O</b>                                 | 1.997(8)                    | 2.025(9)                                                  | 2.035(7)                                                  |
| <b>Distortion B'-O<sub>6</sub> x 10<sup>4</sup></b> | 8.442                       | 6.897                                                     | 9.078                                                     |
| <b>B''-O(1) x 2</b>                                 | 2.29(2)                     | 2.26(2)                                                   | 2.21(1)                                                   |
| <b>B''-O(2) x 2</b>                                 | 2.17(2)                     | 2.21(2)                                                   | 2.13(2)                                                   |
| <b>B''-O(3) x 2</b>                                 | 2.14(2)                     | 2.10(2)                                                   | 2.10(2)                                                   |
| <b>Average B''-O</b>                                | 2.200(8)                    | 2.182(9)                                                  | 2.148(6)                                                  |
